# Supplementary material
Source: PubMed Central journal article supplement (PMC2084284)
Supplement: pnas_0704425104_5.pdf [file pnas_0704425104_5.pdf]

**Table 1-** Compatibility of the various models in Figure 10 to accumulated experimental data.

|                                                              | <b>Model A</b>                                                                                                   | <b>Model B</b>                                                                                                   | <b>Model C</b>                                                     | <b>Model D</b>                                                    |
|--------------------------------------------------------------|------------------------------------------------------------------------------------------------------------------|------------------------------------------------------------------------------------------------------------------|--------------------------------------------------------------------|-------------------------------------------------------------------|
|                                                              | $k_{on} = \frac{[H^+]^2 k_{on(EH_2)} + [H^+] K_a k_{on(EH)} + K_a K_a k_{on(E)}}{K_a K_a + [H^+] K_a + [H^+]^2}$ | $k_{on} = \frac{[H^+]^2 k_{on(EH_2)} + [H^+] K_a k_{on(EH)} + (K_a)^2 k_{on(E)}}{(K_a)^2 + [H^+] K_a + [H^+]^2}$ | $k_{on} = \frac{(K_a)^2 k_{on(E)}}{(K_a)^2 + [H^+] K_a + [H^+]^2}$ | $k_{on} = \frac{k_{on(EH_2)} [H^+] + k_{on(E)} K_a}{K_a + [H^+]}$ |
| <b>R<sup>2</sup></b>                                         | 0.982                                                                                                            | 0.957                                                                                                            | 0.935                                                              | 0.973                                                             |
| <b>Stoichiometry of 2H<sup>+</sup>/ 1 Dimer</b>              | Yes                                                                                                              | Yes                                                                                                              | Yes                                                                | No                                                                |
| <b>pK<sub>a</sub> well above 7.0</b>                         | pK <sub>a1</sub> = 6.80    pK <sub>a2</sub> = 8.16                                                               | pK <sub>a</sub> = 7.70                                                                                           | pK <sub>a</sub> = 7.28                                             | pK <sub>a</sub> = 7.72                                            |
| <b>Single pK<sub>a</sub></b>                                 | No                                                                                                               | Yes                                                                                                              | Yes                                                                | Yes                                                               |
| <b>Single exponential binding reaction (No intermediate)</b> | No                                                                                                               | No                                                                                                               | Yes                                                                | Yes                                                               |

Model A assumes two different pK<sub>a</sub>'s and three different rates for fully protonated protein ( $k_{on(EH_2)}$ ), protein that released one proton ( $k_{on(EH)}$ ) and deprotonated protein ( $k_{on(E)}$ ). Model B is similar to A, but assumes that the pK<sub>a</sub>'s of the two groups are identical. Model C is similar to B but under the assumption that binding to protonated protein is impossible, therefore  $k_{on(EH_2)}$  and  $k_{on(EH)}$  are both zero. Model D is a model for protonation of a single group, under the assumption that the two protons leave the protein practically at the same time due to high cooperativity. The validity of the models is challenged with four different accumulated experimental results.
