# Supplementary material
Source: PubMed Central journal article supplement (PMC2084284)

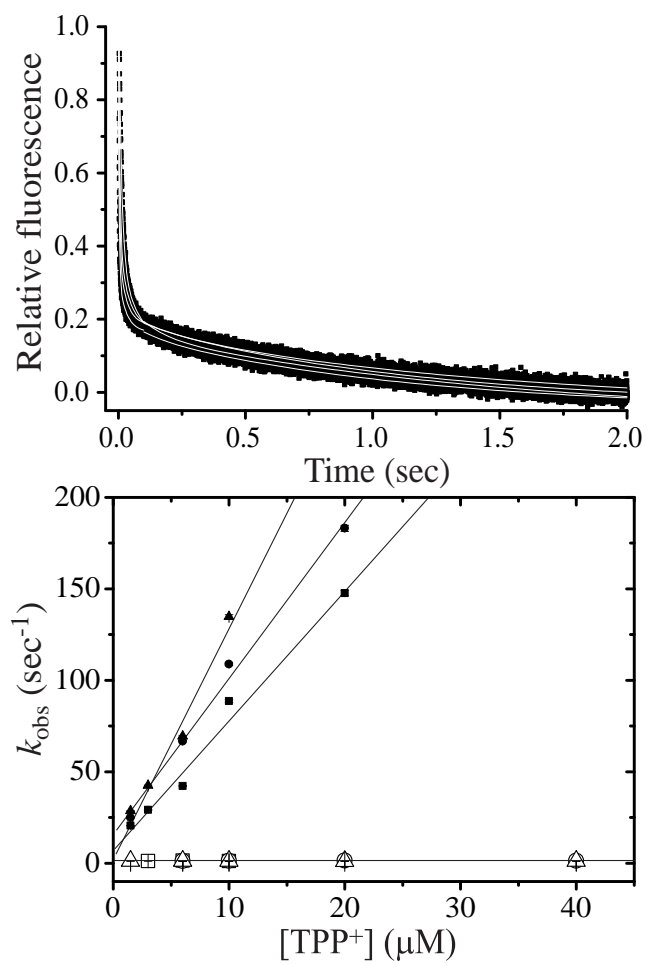

Fig 7.

Supplement: pnas_0704425104_1.pdf [file pnas_0704425104_1.pdf]

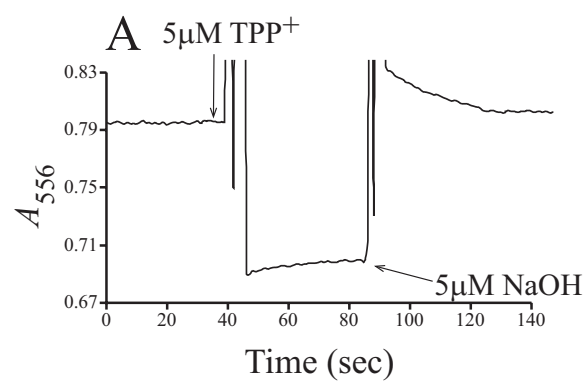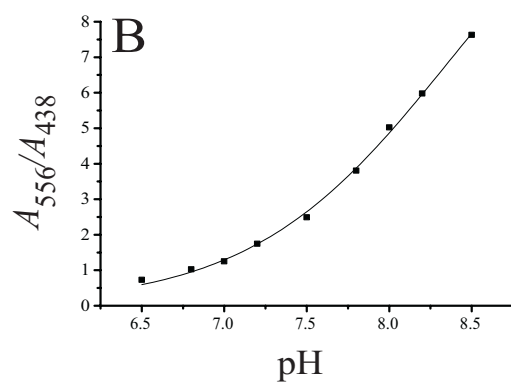

Fig 8.

Supplement: pnas_0704425104_2.pdf [file pnas_0704425104_2.pdf]

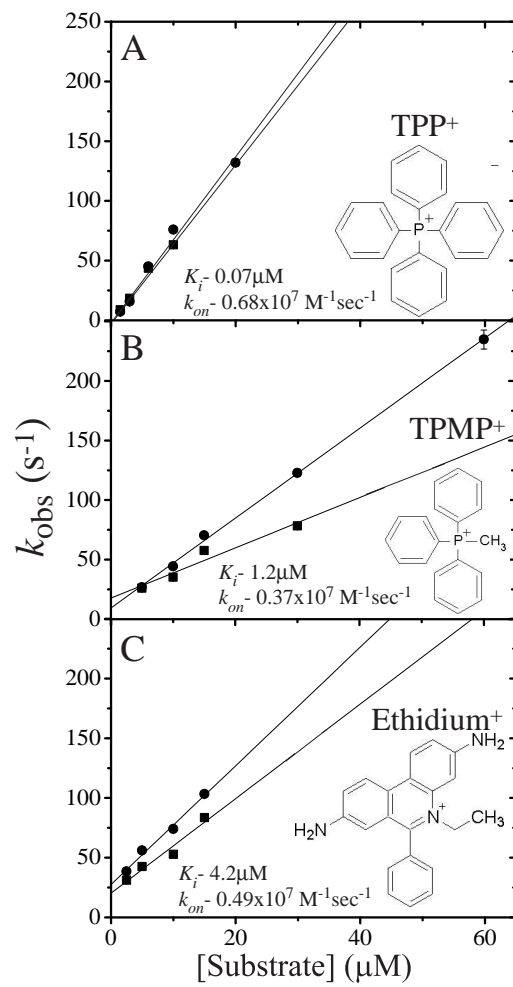

Fig 9.

Supplement: pnas_0704425104_3.pdf [file pnas_0704425104_3.pdf]

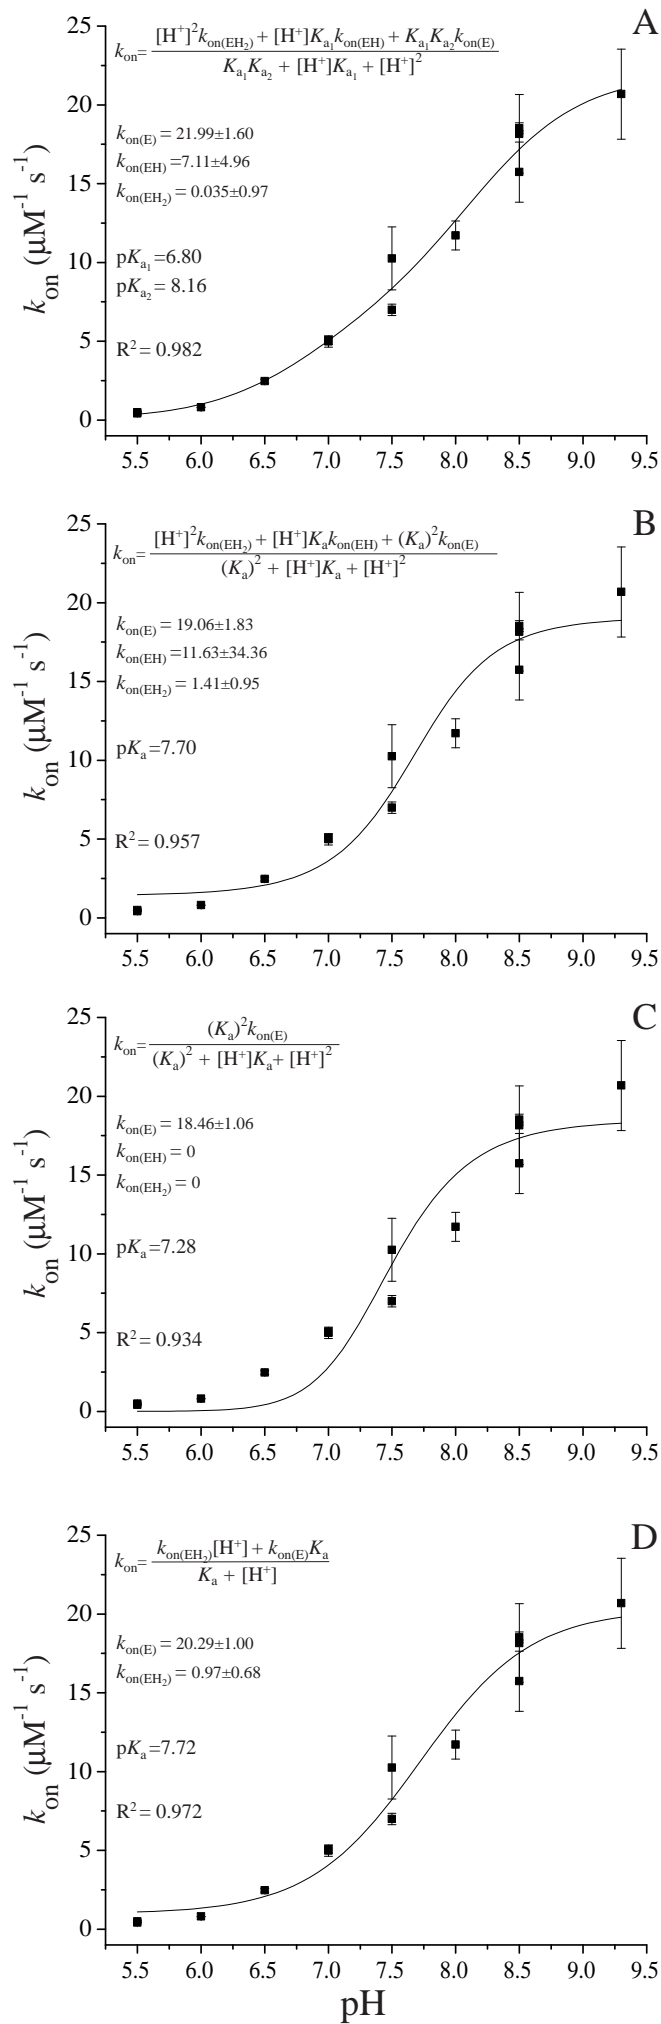

Fig 10.

Supplement: pnas_0704425104_4.pdf [file pnas_0704425104_4.pdf]
